# Supplementary material
Source: publisher figshare collection journal article supplement (https://acs.figshare.com/ndownloader/files/13283921)
Supplement: Supplementary file 1 [file 13283921]

Compound	SMILES	IC50 (uM)	CC50 (uM)
1	N32C(Cc1c(cc(c(c1)OC)OC)C2=CC(=O)C(=C3)C(=O)O)C	0.87	>50
2	N32CCc1c(cc(c(c1)OC)OC)C2=CC(=O)C(=C3)C(=O)O	2.64	>50
3	N32C(Cc1c(ccc(c1)OC)C2=CC(=O)C(=C3)C(=O)O)C	4.97	>50
4	N32C(Cc1c(cccc1)C2=CC(=O)C(=C3)C(=O)O)C	52	>50
5	N32C(Cc1c(cc(c(c1)OC)C)C2=CC(=O)C(=C3)C(=O)O)C	0.24	>50
6	Clc1c(cc3c(c1)C2=CC(=O)C(=CN2C(C3)C)C(=O)O)OC	0.29	>50
7	N32C(Cc1c(cc(c(c1)OC)OCC)C2=CC(=O)C(=C3)C(=O)O)C	1.2	>50
8	N32C(Cc1c(cc(c(c1)OC)OCCC)C2=CC(=O)C(=C3)C(=O)O)C	1.98	>50
9	N43C(Cc1c(cc(c(c1)OC)OCc2ccccc2)C3=CC(=O)C(=C4)C(=O)O)C	29	>50
10	N32C(Cc1c(cc(c(c1)OC)OCCOC)C2=CC(=O)C(=C3)C(=O)O)C	>50	>50
11	N32C(Cc1c(cc(c(c1)O)OC)C2=CC(=O)C(=C3)C(=O)O)C	7.24	>50
12	N32C(Cc1c(cc(cc1)OC)C2=CC(=O)C(=C3)C(=O)O)C	7.67	>50
13	N32C(Cc1c(cc(c(c1)OCC)OC)C2=CC(=O)C(=C3)C(=O)O)C	0.097	>50
14	N43C(Cc1c(cc(c(c1)OCc2ccccc2)OC)C3=CC(=O)C(=C4)C(=O)O)C	0.1	>50
15	Brc1cc3c(cc1)C2=CC(=O)C(=CN2C(C3)C)C(=O)O	4.75	>50
16	N32C(Cc1c(ccc(c1)N(C)C)C2=CC(=O)C(=C3)C(=O)O)C	0.58	>50
17	N1(CCCC1)c2cc4c(cc2)C3=CC(=O)C(=CN3C(C4)C)C(=O)O	0.081	>50
18	N32C(Cc1c(ccc(c1)NC)C2=CC(=O)C(=C3)C(=O)O)C	8.99	>50
19	N32C(Cc1c(cc(c(c1)OCC)O)C2=CC(=O)C(=C3)C(=O)O)C	1.86	>50
20	Clc1c3c(ccc1OC)C2=CC(=O)C(=CN2C(C3)C)C(=O)O	5.03	>50
21	N32C(Cc1c(c(cc(c1)OC)OC)C2=CC(=O)C(=C3)C(=O)O)C	4.56	>50
22	N32C(Cc1c(cc(c(c1)OC)OC)C2=CC(=O)C(=C3)C(=O)O)CC	0.11	>50
(R)-22	N32[C@@H](Cc1c(cc(c(c1)OC)OC)C2=CC(=O)C(=C3)C(=O)O)CC	0.049	>50
(S)-22	N32[C@H](Cc1c(cc(c(c1)OC)OC)C2=CC(=O)C(=C3)C(=O)O)CC	10.9	>50
23	N32C(Cc1c(cc(c(c1)OC)OC)C2=CC(=O)C(=C3)C(=O)O)CCC	0.068	>50
24	N32C(Cc1c(cc(c(c1)OC)OC)C2=CC(=O)C(=C3)C(=O)O)CC(C)C	0.052	>50
25	N43C(Cc1c(cc(c(c1)OCc2ccccc2)OC)C3=CC(=O)C(=C4)C(=O)O)CC	0.039	>50
26	N32C(Cc1c(cc(c(c1)OCC)OC)C2=CC(=O)C(=C3)C(=O)O)CC	0.043	>50
27	N32C(Cc1c(cc(c(c1)OCCC)OC)C2=CC(=O)C(=C3)C(=O)O)CC	0.02	>50
28	N32C(Cc1c(cc(c(c1)OCCCC)OC)C2=CC(=O)C(=C3)C(=O)O)CC	0.018	>50
29	N32C(Cc1c(cc(c(c1)OCC(C)C)OC)C2=CC(=O)C(=C3)C(=O)O)CC	0.013	>50
30	N43C(Cc1c(cc(c(c1)OCC2CC2)OC)C3=CC(=O)C(=C4)C(=O)O)CC	0.015	>50
31	N43C(Cc1c(cc(c(c1)OCCC2CCCCC2)OC)C3=CC(=O)C(=C4)C(=O)O)CC	0.043	20.7
32	FC(F)COc1c(cc2c(c1)CC(N3C2=CC(=O)C(=C3)C(=O)O)CC)OC	0.059	>50
33	N32C(Cc1c(cc(c(c1)OC(C)C)OC)C2=CC(=O)C(=C3)C(=O)O)CC	0.09	>50
34	N32C(Cc1c(cc(c(c1)CCC)OC)C2=CC(=O)C(=C3)C(=O)O)CC	0.37	>50
35	N32C(Cc1c(cc(c(c1)C#N)OC)C2=CC(=O)C(=C3)C(=O)O)CC	0.33	>50
36	N43C(Cc1c(cc2c(c1)OCCCO2)C3=CC(=O)C(=C4)C(=O)O)CC	1.94	>50
37	N43C(Cc1c(cc2c(c1)OCCO2)C3=CC(=O)C(=C4)C(=O)O)CC	0.67	>50
38	N32C(Cc1c(cc(c(c1)OC)CC)C2=CC(=O)C(=C3)C(=O)O)CC	0.024	>50
39	N43C(Cc1c(cc(c(c1)OC)C2CC2)C3=CC(=O)C(=C4)C(=O)O)CC	0.013	>50
40	N32C(Cc1c(cc(c(c1)OCC(=O)N)OC)C2=CC(=O)C(=C3)C(=O)O)CC	26.1	>50
41	N32C(Cc1c(cc(c(c1)OCCNC(=O)C)OC)C2=CC(=O)C(=C3)C(=O)O)CC	3.9	>50
42	S(=O)(=O)(NCCOc1c(cc2c(c1)CC(N3C2=CC(=O)C(=C3)C(=O)O)CC)OC)C	5	>50
43	N43C(Cc1c(cc(c(c1)OCCN2CCCC2=O)OC)C3=CC(=O)C(=C4)C(=O)O)CC	0.18	>50
44	N1(CCCC1)CCOc2c(cc3c(c2)CC(N4C3=CC(=O)C(=C4)C(=O)O)CC)OC	3.1	>50
45	N1(CCOCC1)CCOc2c(cc3c(c2)CC(N4C3=CC(=O)C(=C4)C(=O)O)CC)OC	0.16	>50
46	N32C(Cc1c(cc(c(c1)OCCO)OC)C2=CC(=O)C(=C3)C(=O)O)CC	0.56	>50
47	N32C(Cc1c(cc(c(c1)OCCCO)OC)C2=CC(=O)C(=C3)C(=O)O)CC	0.2	>50
48	N32C(Cc1c(cc(c(c1)OCCOC)OC)C2=CC(=O)C(=C3)C(=O)O)CC	0.064	>50
49	N32C(Cc1c(cc(c(c1)OCCCOC)OC)C2=CC(=O)C(=C3)C(=O)O)CC	0.019	>50
50	N32C(Cc1c(cc(c(c1)OCCOCCOC)OC)C2=CC(=O)C(=C3)C(=O)O)CC	0.22	>50
51	N43C(Cc1c(cc(c(c1)OCC2CCOCC2)OC)C3=CC(=O)C(=C4)C(=O)O)CC	0.028	>50
52	N32C(Cc1c(cc(c(c1)OCCOCC)OC)C2=CC(=O)C(=C3)C(=O)O)CC	0.056	>50
53	N43C(Cc1c(cc(c(c1)OCc2ccccc2)OC)C3=CC(=O)C(=C4)C(=O)N)CC	>50	>50
54	N43C(Cc1c(cc(c(c1)OCc2ccccc2)OC)C3=CC(=O)C(=C4)C(=O)NC)CC	19	>50
55	N43C(Cc1c(cc(c(c1)OCc2ccccc2)OC)C3=CC(=O)C(=C4)C(=O)N(C)C)CC	>50	>50
56	N1(CCOCC1)C(=O)C5=CN4C(Cc2c(cc(c(c2)OCc3ccccc3)OC)C4=CC5=O)CC	>50	>50
57	N43C(Cc1c(cc(c(c1)OCc2ccccc2)OC)C3=CC(=O)C(=C4)C(=O)NCCC)CC	6.4	>50
58	N43C(Cc1c(cc(c(c1)OCc2ccccc2)OC)C3=CC(=O)C(=C4)C(=O)NCCO)CC	43	>50
59	N43C(Cc1c(cc(c(c1)OCc2ccccc2)OC)C3=CC(=O)C(=C4)C(=O)NCCOC)CC	13	>50
60	N43C(Cc1c(cc(c(c1)OCc2ccccc2)OC)C3=CC(=O)C(=C4)C(=O)NC(CO)C)CC	6.6	>50
61	N43C(Cc1c(cc(c(c1)OCc2ccccc2)OC)C3=CC(=O)C(=C4)C(=O)NC(COC)C)CC	0.52	>50
62	N43C(Cc1c(cc(c(c1)OCc2ccccc2)OC)C3=CC(=O)C(=C4)C(=O)NO)CC	19	48.7
63	S(=O)(=O)(NC(=O)C4=CN3C(Cc1c(cc(c(c1)OCc2ccccc2)OC)C3=CC4=O)CC)C	0.98	>50
64	N32C(Cc1c(cc(c(c1)OCCCOC)OC)C2=CC(=O)C(=C3)C(=O)O)C(C)C	0.009	>50
(S)-64	N32[C@@H](Cc1c(cc(c(c1)OCCCOC)OC)C2=CC(=O)C(=C3)C(=O)O)C(C)C	0.003	>50
(R)-64	N32[C@H](Cc1c(cc(c(c1)OCCCOC)OC)C2=CC(=O)C(=C3)C(=O)O)C(C)C	3.15	>50
65	N32C(Cc1c(cc(c(c1)OCCCOC)OC)C2=CC(=O)C(=C3)C(=O)O)C(C)(C)C	0.001	>50
66	N32C(Cc1c(cc(c(c1)OCCCOC)OC)C2=CC(=O)C(=C3)C(=O)O)C4(CC4)C	0.002	>50
67	FC(F)(F)CC3N1C(=CC(=O)C(=C1)C(=O)O)c2c(cc(c(c2)OC)OCCCOC)C3	0.039	>50
68	N32C(Cc1c(cc(c(c1)OCCCOC)OC)C2=CC(=O)C(=C3)C(=O)O)COC	0.074	>50
69	N32C(Cc1c(cc(c(c1)OCCCOC)OC)C2=CC(=O)C(=C3)C(=O)O)C(COC)(C)C	0.005	>50
70	N32C(Cc1c(cc(c(c1)OCCCOC)OC)C2=CC(=O)C(=C3)C(=O)O)C(O)(C)C	0.13	>50
71	N32C(Cc1c(cc(c(c1)OCCCOC)OC)C2=CC(=O)C(=C3)C(=O)O)C(CO)(C)C	0.006	>50
(S)-71	N32[C@@H](Cc1c(cc(c(c1)OCCCOC)OC)C2=CC(=O)C(=C3)C(=O)O)C(CO)(C)C	0.002	>50
(R)-71	N32[C@H](Cc1c(cc(c(c1)OCCCOC)OC)C2=CC(=O)C(=C3)C(=O)O)C(CO)(C)C	0.088	>50
72	N32C(Cc1c(cc(c(c1)OCCCOC)OC)C2=CC(=O)C(=C3)C(=O)O)c4c(cccc4)C	0.01	>50
73	N32C(Cc1c(cc(c(c1)OCCCOC)OC)C2=CC(=O)C(=C3)C(=O)O)c4ccccc4	0.064	>50
74	N32C(Cc1c(cc(c(c1)OCCCOC)OC)C2=CC(=O)C(=C3)C(=O)O)c4ccc(cc4)OC	0.8	>50
75	Clc1cc(ccc1)C4N2C(=CC(=O)C(=C2)C(=O)O)c3c(cc(c(c3)OC)OCCCOC)C4	0.092	>50
76	s1cc(cc1)C4N2C(=CC(=O)C(=C2)C(=O)O)c3c(cc(c(c3)OC)OCCCOC)C4	0.01	>50
77	s1c(ccc1)C4N2C(=CC(=O)C(=C2)C(=O)O)c3c(cc(c(c3)OC)OCCCOC)C4	0.003	>50
